# Supplementary material for: No mass extinction for land plants at the Permian–Triassic transition
Source: PubMed Central journal article supplement (PMC6344494; doi:10.1038/s41467-018-07945-w), 2019-01-23
Supplement: 41467_2018_7945_MOESM3_ESM.pdf [file 41467_2018_7945_MOESM3_ESM.pdf]

## **Description of Additional Supplementary Files**

File Name: Supplementary Data 1

Description: Range charts of plant macro- and microfossil taxa across the Wuchiapingian to Ladinian interval.

File Name: Supplementary Data 2

Description: Summarizing the calculated plant diversity indices.

File Name: Supplementary Data 3

Description: Spearman's rank correlation coefficient for the correlation between selected diversity indices and corresponding p-values.

File Name: Supplementary Data 4

Description: Raw occurrence data of land plant macrofossils, with taxonomic and stratigraphic corrections.

File Name: Supplementary Data 5

Description: Raw occurrence data of spores and pollen, with taxonomic and stratigraphic corrections.

File Name: Supplementary Data 6

Description: R script for the generation of the results presented in Supplementary Data 1–3 from the data given in Supplementary Data 4 and 5.
